# Supplementary material for: MoGLN2 Is Important for Vegetative Growth, Conidiogenesis, Maintenance of Cell Wall Integrity and Pathogenesis of Magnaporthe oryzae
Source: MDPI journal article supplement (doi:10.3390/jof7060463), 2021-06-08

**A****KEGG Enrichment of Up-regulated Genes****KEGG Pathway**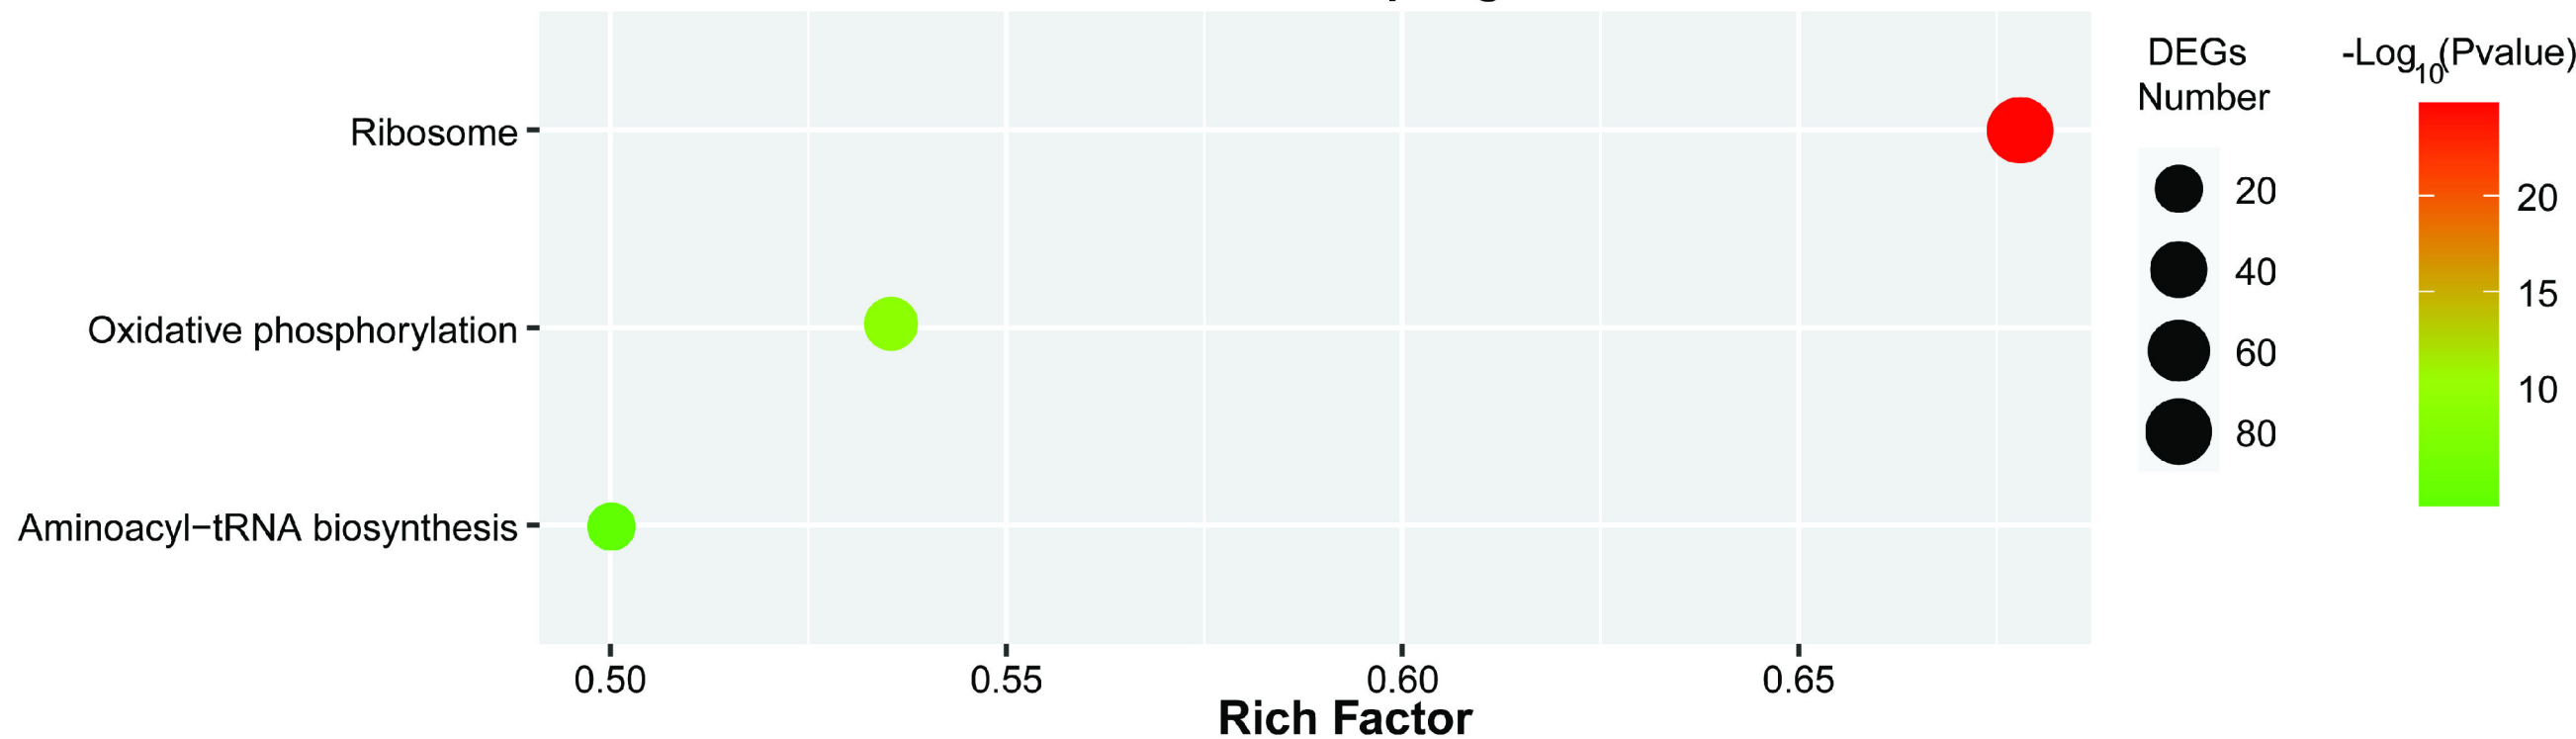**B****KEGG Enrichment of Down-regulated Genes****KEGG Pathway**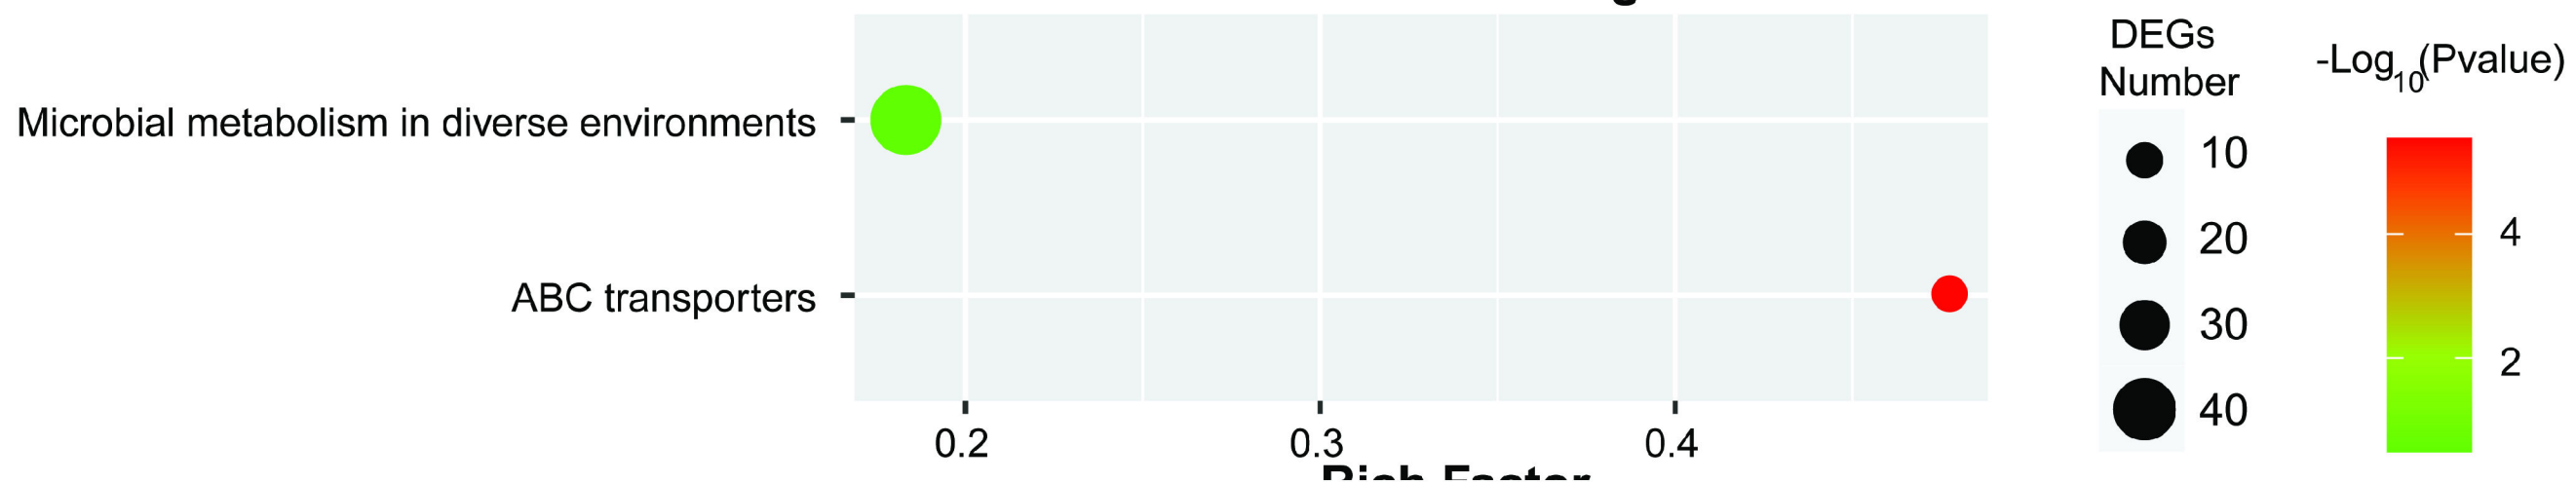

Supplement: s1 [file s1]
