# Supplementary material for: MoGLN2 Is Important for Vegetative Growth, Conidiogenesis, Maintenance of Cell Wall Integrity and Pathogenesis of Magnaporthe oryzae
Source: MDPI journal article supplement (doi:10.3390/jof7060463), 2021-06-08
Supplement: s1 [file s1]

Table S1 Primes used in this study

| Primer name | Sequence (5-3')                         | Remarks                   |
|-------------|-----------------------------------------|---------------------------|
| GLN1 AF     | GAACAAAAGCTGGGTGTGGAGCCCAACGTTAC        | Amplify 5'MoGLN1 fragment |
| GLN1 AR     | CAGCGGCGCGCCGAAAATATGGAGCGAGGAGGAT      | Amplify 5'MoGLN1 fragment |
| GLN1 OF     | GCAGAGTACGTCTGGATTG                     | Amplify MoGLN1 ORF        |
| GLN1 OR     | GCAGGTGACGGCATAATTC                     | Amplify MoGLN1 ORF        |
| GLN1 BF     | ACCGGGCCGGCCGGATGAGGTTGCCGTAGGACATC     | Amplify 3'MoGLN1 fragment |
| GLN1 BR     | GGTGGCGGCCGCTCTGCGTGGTCAATATGGCGAAC     | Amplify 3'MoGLN1 fragment |
| HPH F       | TGGAGCTAGTGGAGGTCAAC                    | Amplify HPH probe         |
| HPHR        | CGGCCGCTCTAGAACTAGTG                    | Amplify HPH probe         |
| HYG/F       | GGCTTGGCTGGAGCTAGTGGAGGTCAA             | Amplify 5'MoGLN1 fragment |
| HY/R        | GTATTGACCGATTCTTTCGGTCCGAA              | Amplify 5'MoGLN1 fragment |
| YG/F        | GATGTAGGAGGGCGTGGATATGTCCT              | Amplify 3'HPH fragment    |
| HYG/R       | AACCCGCGGTCGGCATCTACTCTATTC             | Amplify 3'HPH fragment    |
| GLN2 AF     | GAACAAAAGCTGGGTGCTAACAGGGCCAGGTAAAG     | Amplify 5'MoGLN2 fragment |
| GLN2 AR     | CAGCGGCGCGCCGAAGATTTGACTGGCGGCATTTC     | Amplify 5'MoGLN2 fragment |
| GLN2 OF     | TGTCACATACGTCGAGAACC                    | Amplify MoGLN2 ORF        |
| GLN2 OR     | ACCGACACCACAGTAGTATG                    | Amplify MoGLN2 ORF        |
| GLN2 BF     | ACCGGGCCGGCCGGAAAACCTTGGCTTGGCGAACC     | Amplify 3'MoGLN2 fragment |
| GLN2BR      | GGTGGCGGCCGCTCTCGCGCAACTTGACTTTGTCC     | Amplify 3'MoGLN2 fragment |
| GLN3AF      | GAACAAAAGCTGGGTCAGGAGGTGTGTGTGGAATG     | Amplify 5'MoGLN3 fragment |
| GLN3AR      | CAGCGGCGCGCCGAACTTCTCTGTTCAGGCAAAGC     | Amplify 5'MoGLN3 fragment |
| GLN3 OF     | CCAAGGATGGCTTTGGTTTC                    | Amplify MoGLN3 ORF        |
| GLN3 OR     | TGGCCTCGTGAGACTGTA                      | Amplify MoGLN3 ORF        |
| GLN3 BF     | GACAATCGGCTGCTCTGATGCCAGACTTG CATATAGGG | Amplify 3'MoGLN2 fragment |
| GLN3 BR     | CTCCTATGATCGTTTACCCAAATAGGGAAGGGCTGGG   | Amplify 3'MoGLN2 fragment |
| QGLN1 FW    | ATGGCGACACAACAGGTATC                    | qPCR of MoGLN1            |
| QGLN1 RV    | CTGTCAATCCAGACGTACTC                    | qPCR of MoGLN1            |
| QGLN3 FW    | ACATGCACGACCAGACCTAC                    | qPCR of MoGLN3            |
| QGLN3 RV    | AAGAACGGGATGTCGTTCTC                    | qPCR of MoGLN3            |
| Buf1 F      | ACGCCGTCTACTCAGGATCA                    | qPCR of MoBUF1            |
| Buf1 R      | TCTCGCCGTTTGAATGTAT                     | qPCR of MoBUF1            |
| Alb F       | GCAATGTCCGGTCCCAACTAC                   | qPCR of MoALB1            |
| Alb R       | ATCTCAAAGGCGATGACACC                    | qPCR of MoALB1            |
| Rsy1 F      | CGACTCCAAGGACTGGGATA                    | qPCR of MoRSY1            |
| Rsy1 R      | GTCTCGGACACCTTCTCC                      | qPCR of MoRSY1            |
| QCOS1 F     | TGTGGTTCCTGTCCCTTCTC                    | qPCR of MoCOS1            |
| QCOS1 R     | TGTAGCCTGGCGAGTCCAAC                    | qPCR of MoCOS1            |
| QCON6 F     | AGTCCAAGCAGCACTCGAAG                    | qPCR of MoCON6            |
| QCON6 R     | CTTGATGGCAGCCTTGAGAC                    | qPCR of MoCON6            |
| QCON7 F     | CACCACCAGCTTTCCTCATC                    | qPCR of MoCON7            |
| QCON7 R     | AACCTGACTGCGAGTAATCC                    | qPCR of MoCON7            |
| QHOX6 F     | TTCCCTTCCCAGTTCACTTC                    | qPCR of MoHOX6            |
| QHOX6 R     | GCTGCTACCGGGAGAATTTG                    | qPCR of MoHOX6            |
| QMOACTIN F  | CCATGTACCCTGGTCTTTTCG                   | qPCR of MoACTIN           |
| QMOACTIN R  | TTCGAGATCCACATCTGCTG                    | qPCR of MoACTIN           |
| COM1 F      | TGAGCGATGACATGCTTGAG                    | qPCR of MoCOM1            |
| COM1 R      | GAGTGATGGGTGCTGTGTTG                    | qPCR of MoCOM1            |
| QSTUA F     | AGGACACGACATGTACTACC                    | qPCR of MoSTUA            |
| QSTUA R     | CTGAGGAGGAGCTGGATAAG                    | qPCR of MoSTUA            |
| QGLN2 F     | TGTCACATACGTCGAGAACC                    | qPCR of MoGLN2            |

|            |                                             |                                 |
|------------|---------------------------------------------|---------------------------------|
| QGLN2 R    | CAGACGTACTCTGCGATGAC                        | qPCR of <i>MoGLN2</i>           |
| GLN3COMF   | GAACAAAAGCTGGGT3'GGTACCCGCTTTCCTCCGCCATTTAG | Amplify <i>MoGLN3</i> Comp frag |
| GLN3COM R  | CTGCAGGCATGCAAGAAGCTTAACTGTTTCGATGTACCTCTT  | Amplify <i>MoGLN2</i> Comp frag |
| GLN2 COM F | GAACAAAAGCTGGGT3'TCCTCCTGTCGGTGAGTTCTG      | Amplify <i>MoGLN2</i> Comp frag |
| GLN2 COM R | CTGCAGGCATGCAAGTGCCTCGCCGAAGCAGGTC          | Amplify <i>MoGLN2</i> Comp frag |
| GLN1 COMF  | GAACAAAAGCTGGGT3'TGAGGTTGCCGTAGGACATC       | Amplify <i>MoGLN1</i> Comp frag |
| GLN1 COMR  | CTGCAGGCATGCAAGTCTGCGTGGTCAATATGGCGAAC      | Amplify <i>MoGLN1</i> Comp frag |

---
