# Supplementary figures and images for: MoGLN2 Is Important for Vegetative Growth, Conidiogenesis, Maintenance of Cell Wall Integrity and Pathogenesis of Magnaporthe oryzae
Source: MDPI journal article supplement (doi:10.3390/jof7060463), 2021-06-08

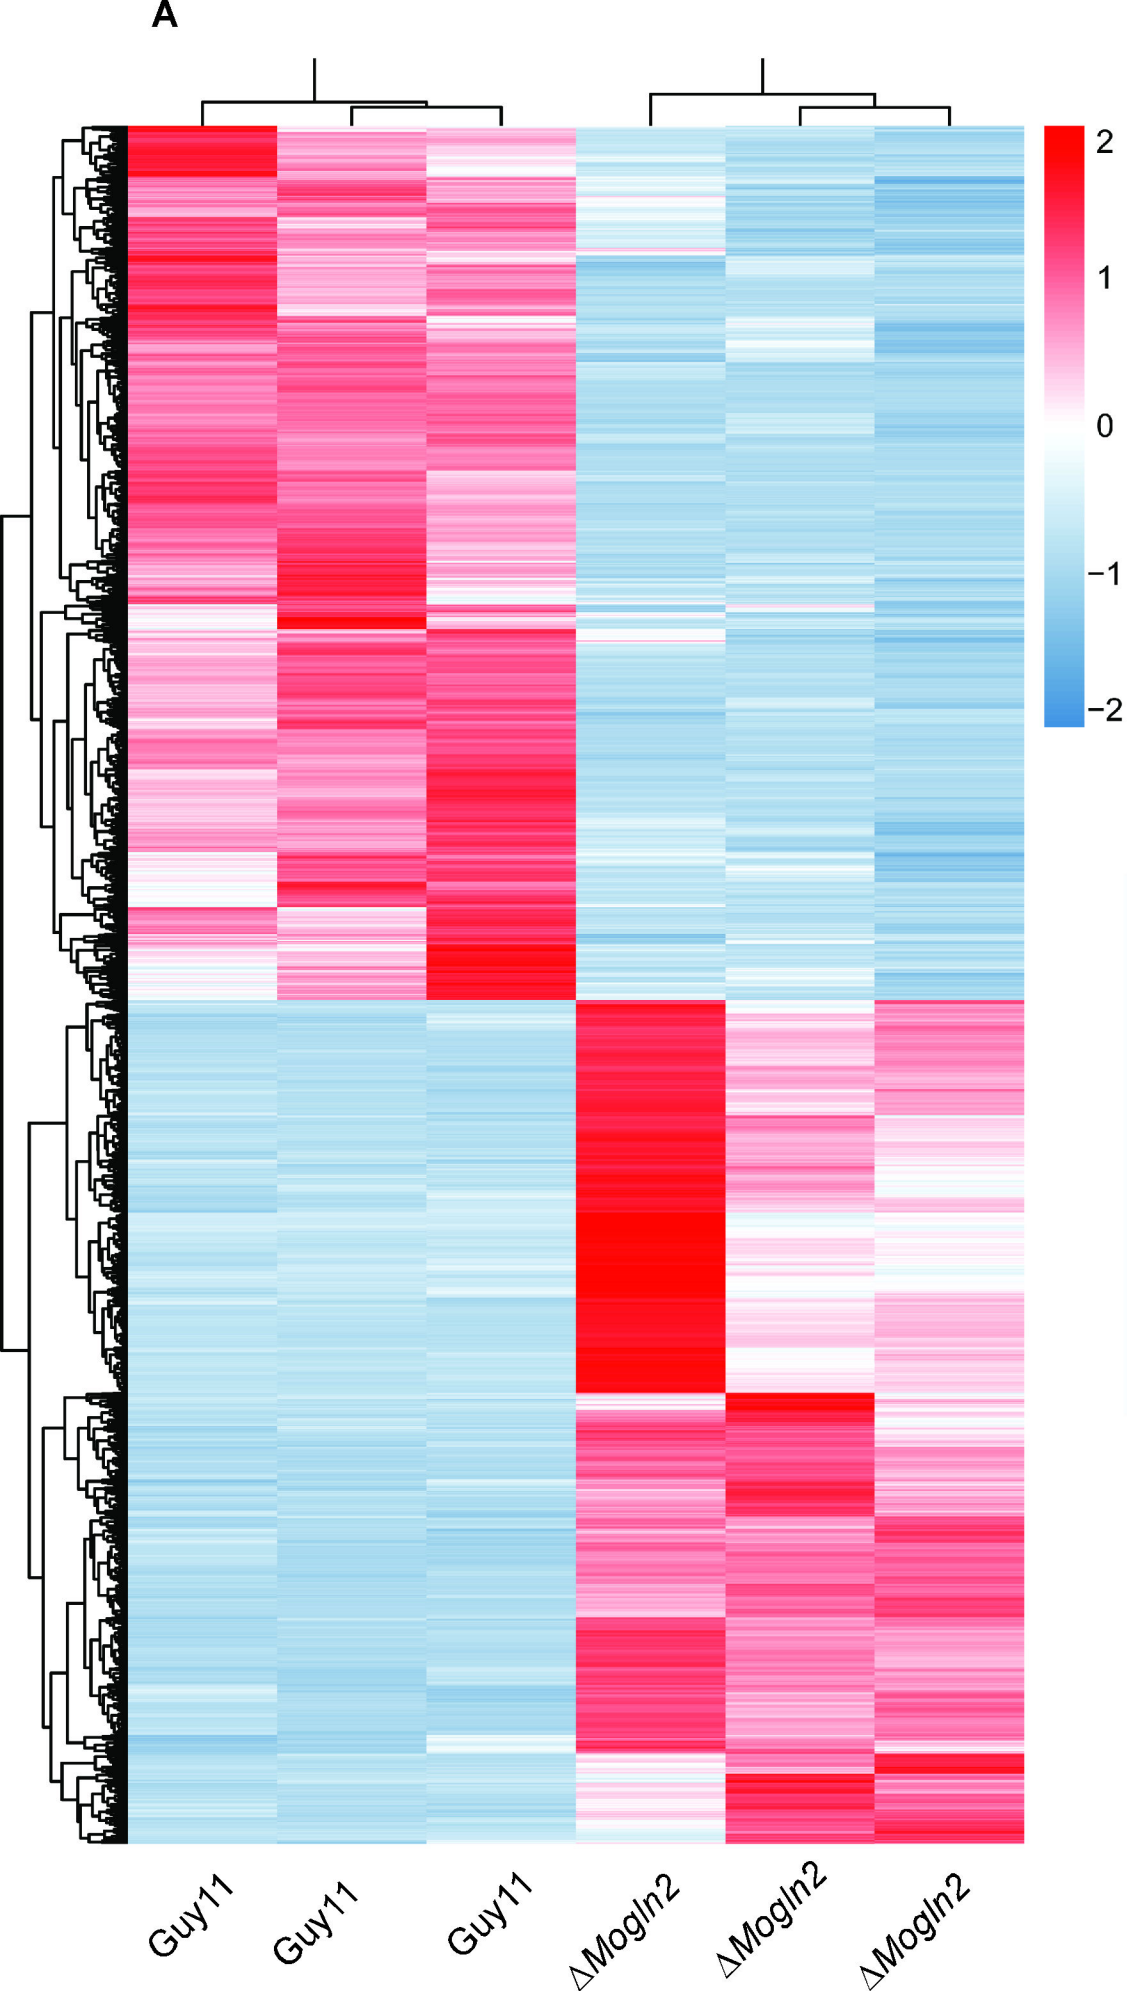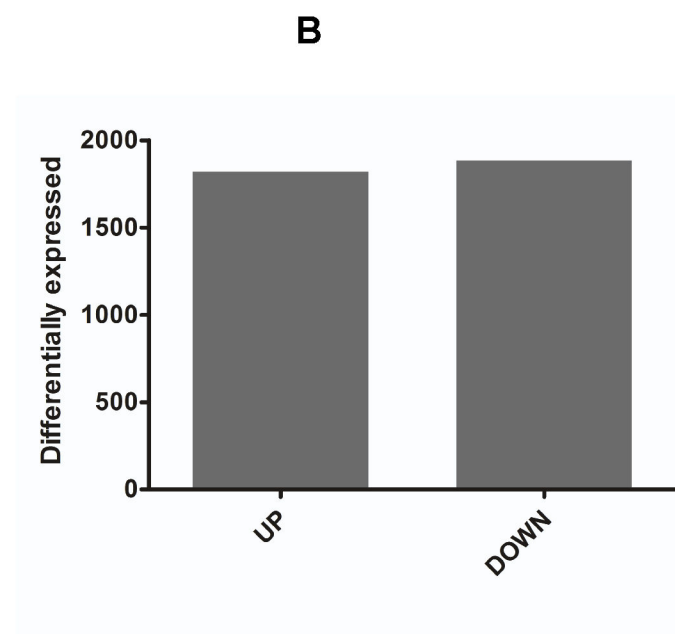

Supplement: s1 [file s1]
